# Supplementary material for: Low temperature structural anomalies arising from competing exchange interactions in pyrochlore Nd2Ru2O7 probed by XRD and EXAFS
Source: Royal Society of Chemistry journal article supplement (doi:10.1039/c5cp03340c), 2015-01-01
Supplement: c5cp03340c1.pdf [file c5cp03340c1.pdf]

**Supplementary Material for**  
**“Low temperature structural anomalies arisen from competing**  
**exchange interactions in pyrochlore  $\text{Nd}_2\text{Ru}_2\text{O}_7$  probed by XRD and**  
**EXAFS”**

Shi-Wei Chen<sup>a</sup>, Shao-Wei Fu<sup>a</sup>, Chih-Wen Pao<sup>a</sup>, Jenn-Min Lee<sup>a</sup>, Shin-An Chen<sup>a</sup>, Shu-Chih Haw<sup>a</sup>, Jyh-Fu Lee<sup>a</sup>, Chun-Hsia Liu<sup>a</sup>, Chung-Kai Chang<sup>a</sup>, Yu-Chun Chuang<sup>a</sup>, Hwo-Shuenn Sheu<sup>a</sup>, Kueih-Tzu Lu<sup>a</sup>, Szu-Tu Ku<sup>b,c</sup>, Lieh-Jeng Chang<sup>b,\*</sup>, and Jin-Ming Chen<sup>a,\*</sup>

<sup>a</sup>National Synchrotron Radiation Research Center, Hsinchu 30076, Taiwan

<sup>b</sup>Department of Physics, National Cheng Kung University, Tainan 70101, Taiwan

<sup>c</sup>Institute of Physics, Academia Sinica, Taipei 11529, Taiwan.

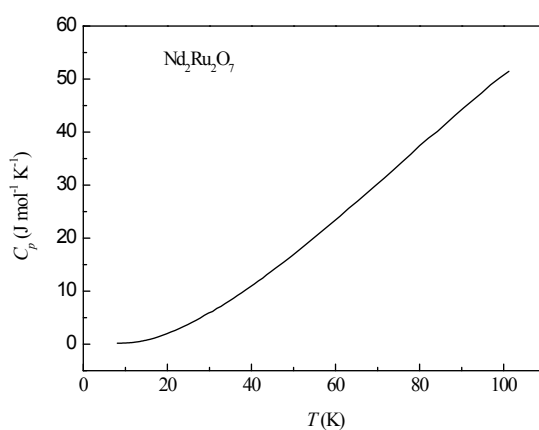

Fig. S1. Specific heat capacity ( $C_p$ ) of  $\text{Nd}_2\text{Ru}_2\text{O}_7$  measured below 100 K.

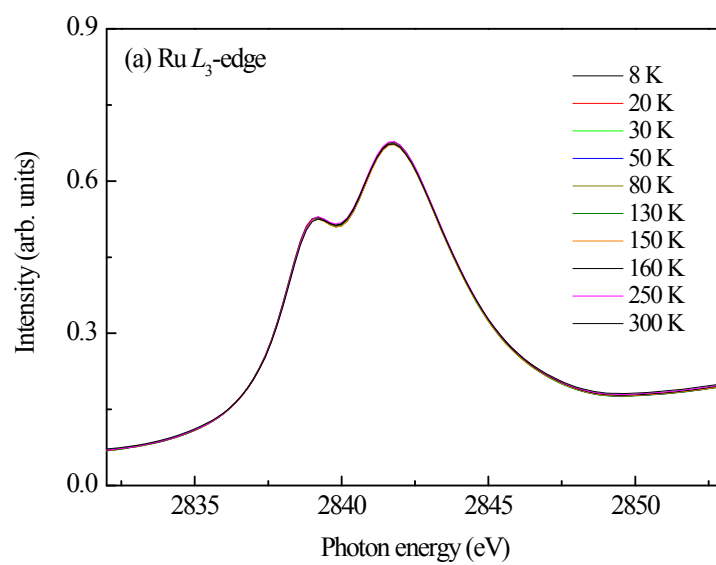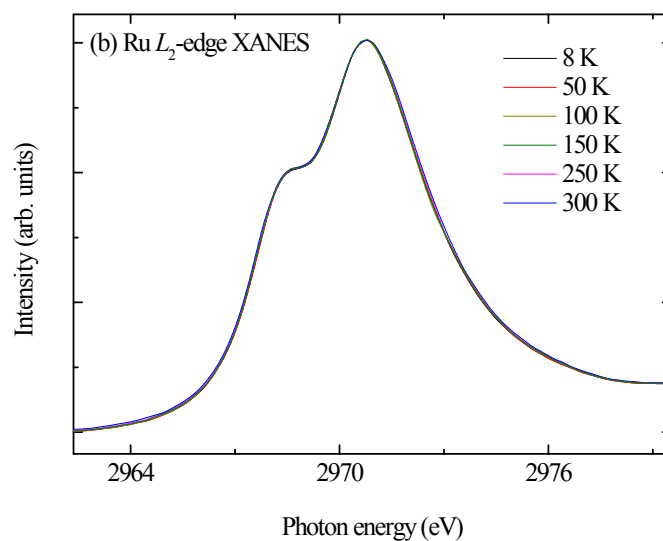

Fig. S2. (a) Ru  $L_3$ -edge and (b) Ru  $L_2$ -edge XANES spectra of  $\text{Nd}_2\text{Ru}_2\text{O}_7$  recorded at various temperatures.

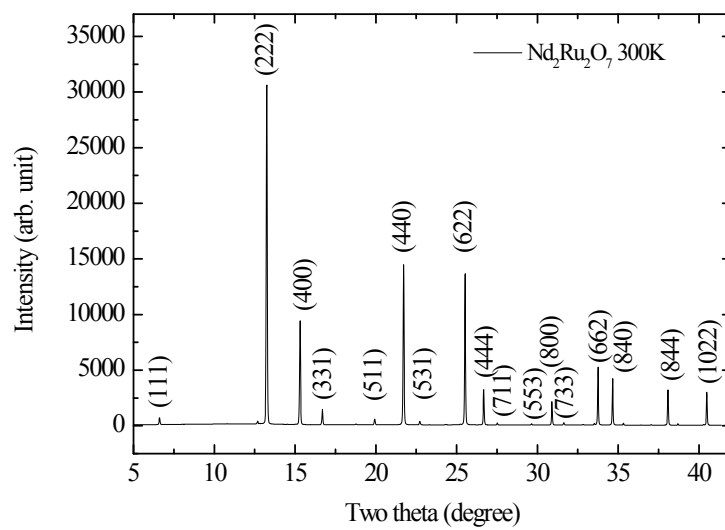

Fig. S3. XRD pattern of Nd<sub>2</sub>Ru<sub>2</sub>O<sub>7</sub> probed at 300K, indexed by ICSD #: 079327.

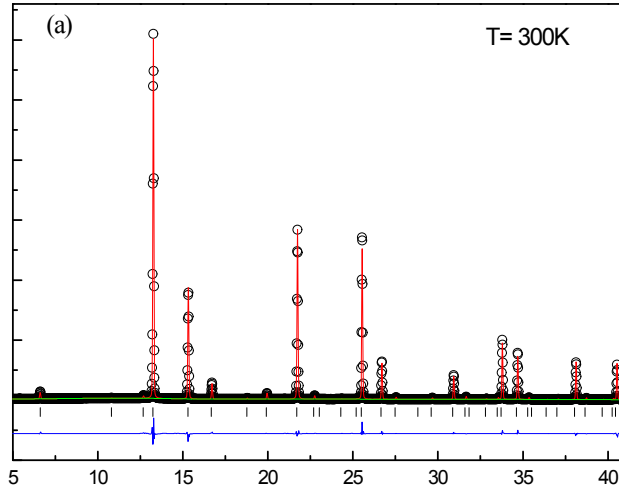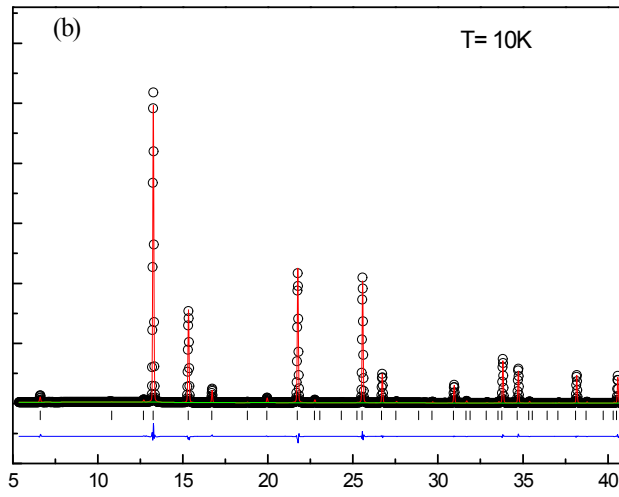

Fig. S4. XRD pattern of  $\text{Nd}_2\text{Ru}_2\text{O}_7$  probed at (a) 300K and (b) 10K, refined with the Rietveld method.
